# Supplementary material for: The selective production of CH4via photocatalytic CO2 reduction over Pd-modified BiOCl
Source: Royal Society of Chemistry journal article supplement (doi:10.1039/d2nj02725a), 2022-01-01
Supplement: d2nj02725a1.pdf [file d2nj02725a1.pdf]

## Supporting Information

### Selective production of CH<sub>4</sub> for photocatalytic CO<sub>2</sub> reduction over Pd modified BiOCl

Zeai Huang<sup>a,b,\*</sup>, Jundao Wu<sup>b</sup>, Minzhi Ma<sup>b</sup>, Junbu Wang<sup>b</sup>, Shuqi Wu<sup>b</sup>, Xiaoyun Hu<sup>b</sup>, Chengdong Yuan<sup>c</sup>, Ying Zhou<sup>a,b,c,\*</sup>

<sup>a</sup>State Key Laboratory of Oil and Gas Reservoir Geology and Exploitation, Southwest Petroleum University, Chengdu 610500, China. E-mail: [zeai.huang@swpu.edu.cn](mailto:zeai.huang@swpu.edu.cn); [yzhou@swpu.edu.cn](mailto:yzhou@swpu.edu.cn); Fax: +86 28 8303-7411; Tel: +86 28 8303-7411

<sup>b</sup>Institute of Carbon Neutrality & School of New Energy and Materials, Southwest Petroleum University, Chengdu 610500, China.

<sup>c</sup>Department of Petroleum Engineering, Kazan Federal University, Kazan 420008, Russia.

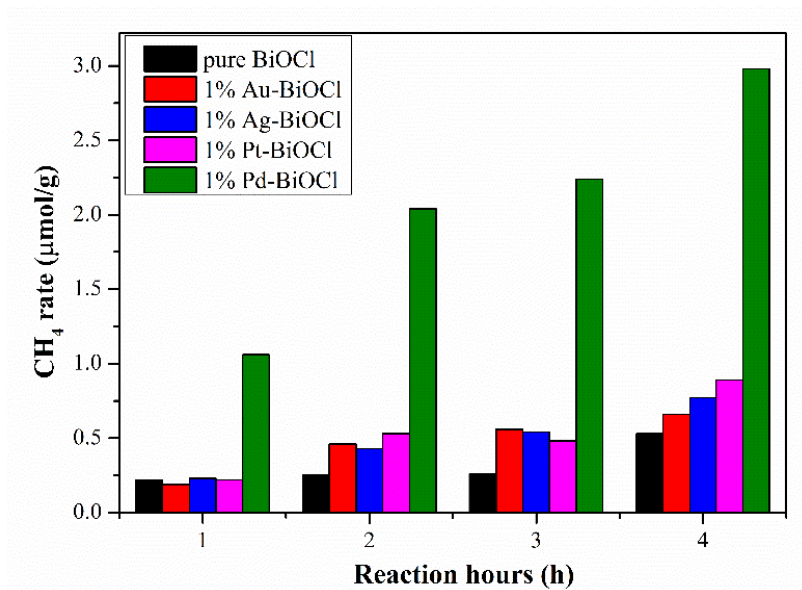

Fig.S1 The time course of Au, Ag, Pt, Pd modified BiOCl and pure BiOCl.

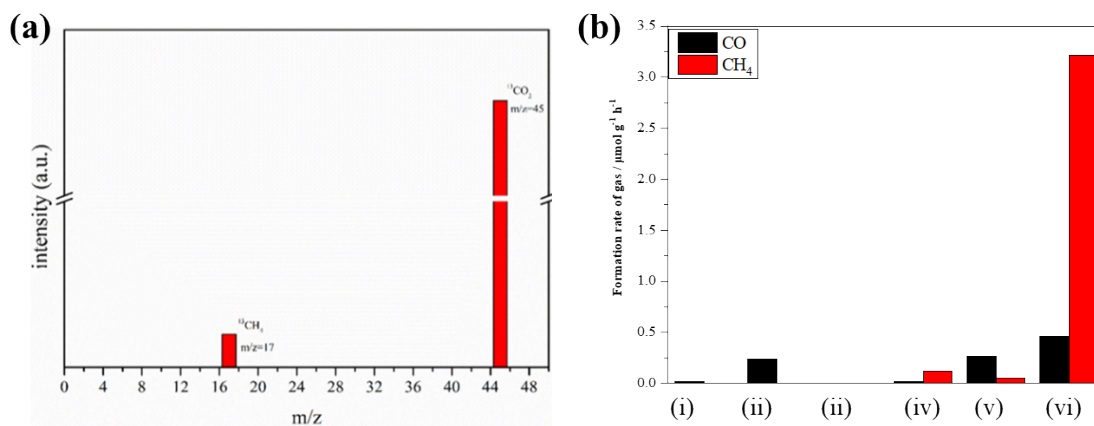

Fig.S2 (a) Mass result of main products during photocatalytic  $\text{CO}_2$  reduction using  $^{13}\text{CO}_2$  during photocatalytic reduction of  $\text{CO}_2$  over 1.0 wt% Pd/BiOCl; (b) blank tests (i) with catalyst only and without (ii) catalyst, (iii) photoirradiation, (iv)  $\text{CO}_2$ , and (v) photocatalyst, respectively, (vi) with catalyst, photoirradiation,  $\text{CO}_2$  and photocatalyst over 1.0 wt% Pd/BiOCl.

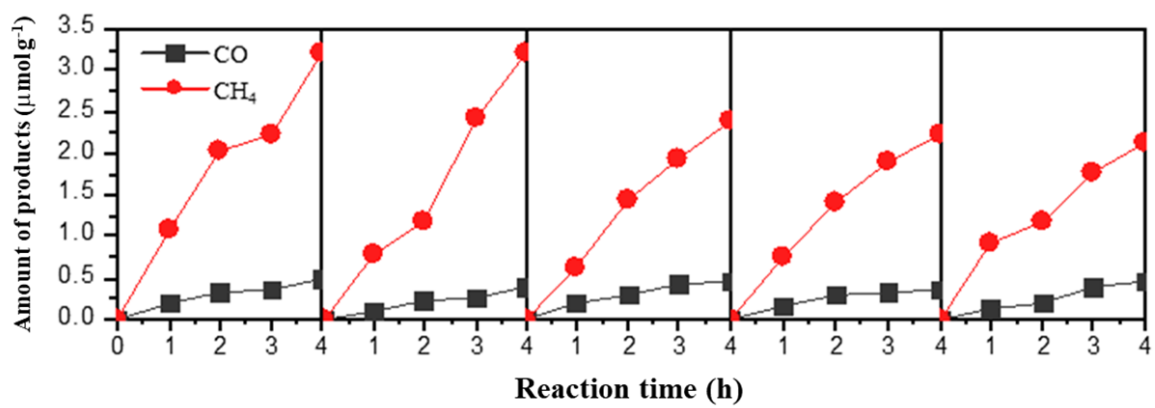

Fig.S3 Recycle test of photocatalytic CO<sub>2</sub> reduction over 1.0 wt% Pd/BiOCl.

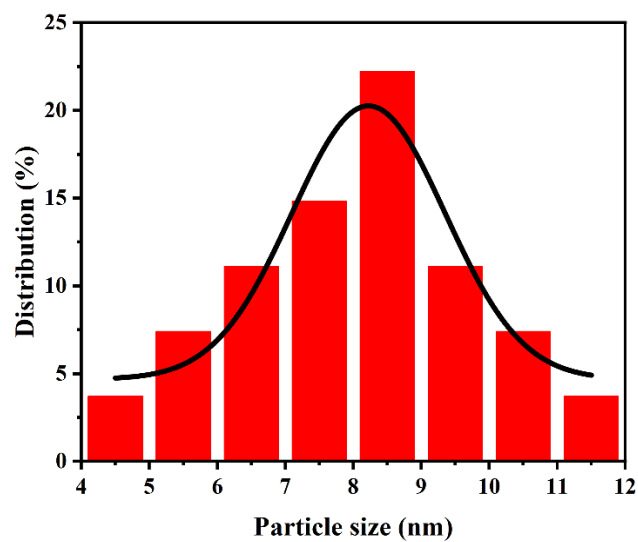

Fig.S4 Pd particle size distribution of 1.0 wt% Pd-BiOCl sample.
